# Supplementary material
Source: PubMed Central journal article supplement (PMC4506863)
Supplement: NIHMS696218-supplement-1.pdf [file NIHMS696218-supplement-1.pdf]

## Supplemental Figure 1

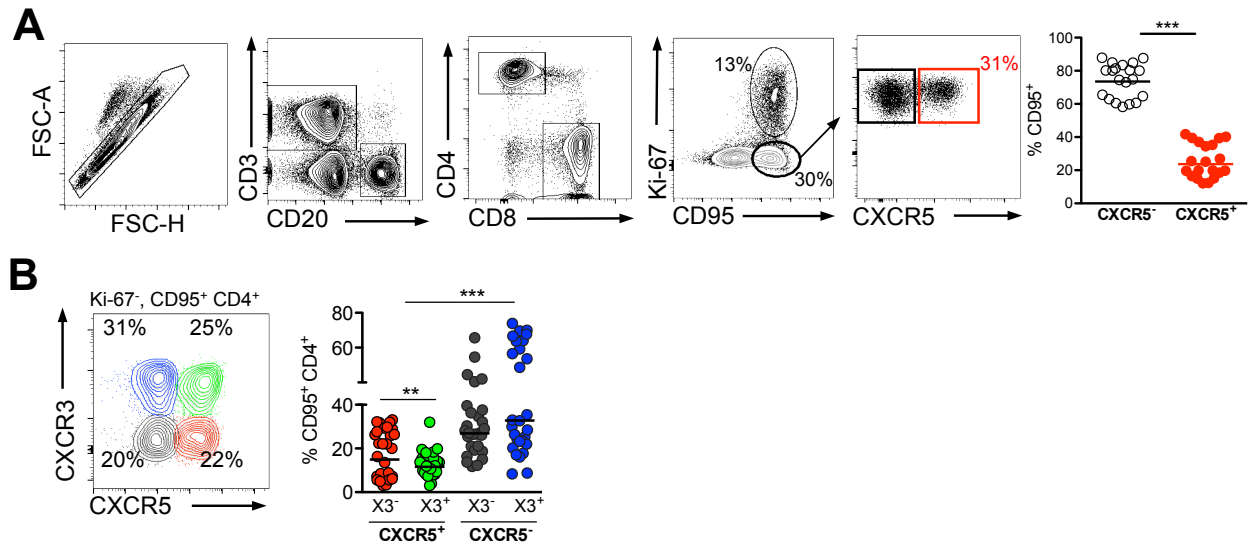

**Supplemental Figure 1: Distribution of CXCR5 subsets on memory CD4 T cells** (A) Gating strategy to examine CD4<sup>+</sup> T cells and distribution of CXCR5 on quiescent memory CD4 T cells (B) Distribution of X5 and X3 subsets among non-cycling memory cells and frequencies shown in scatter plot.

## Supplemental Figure 2

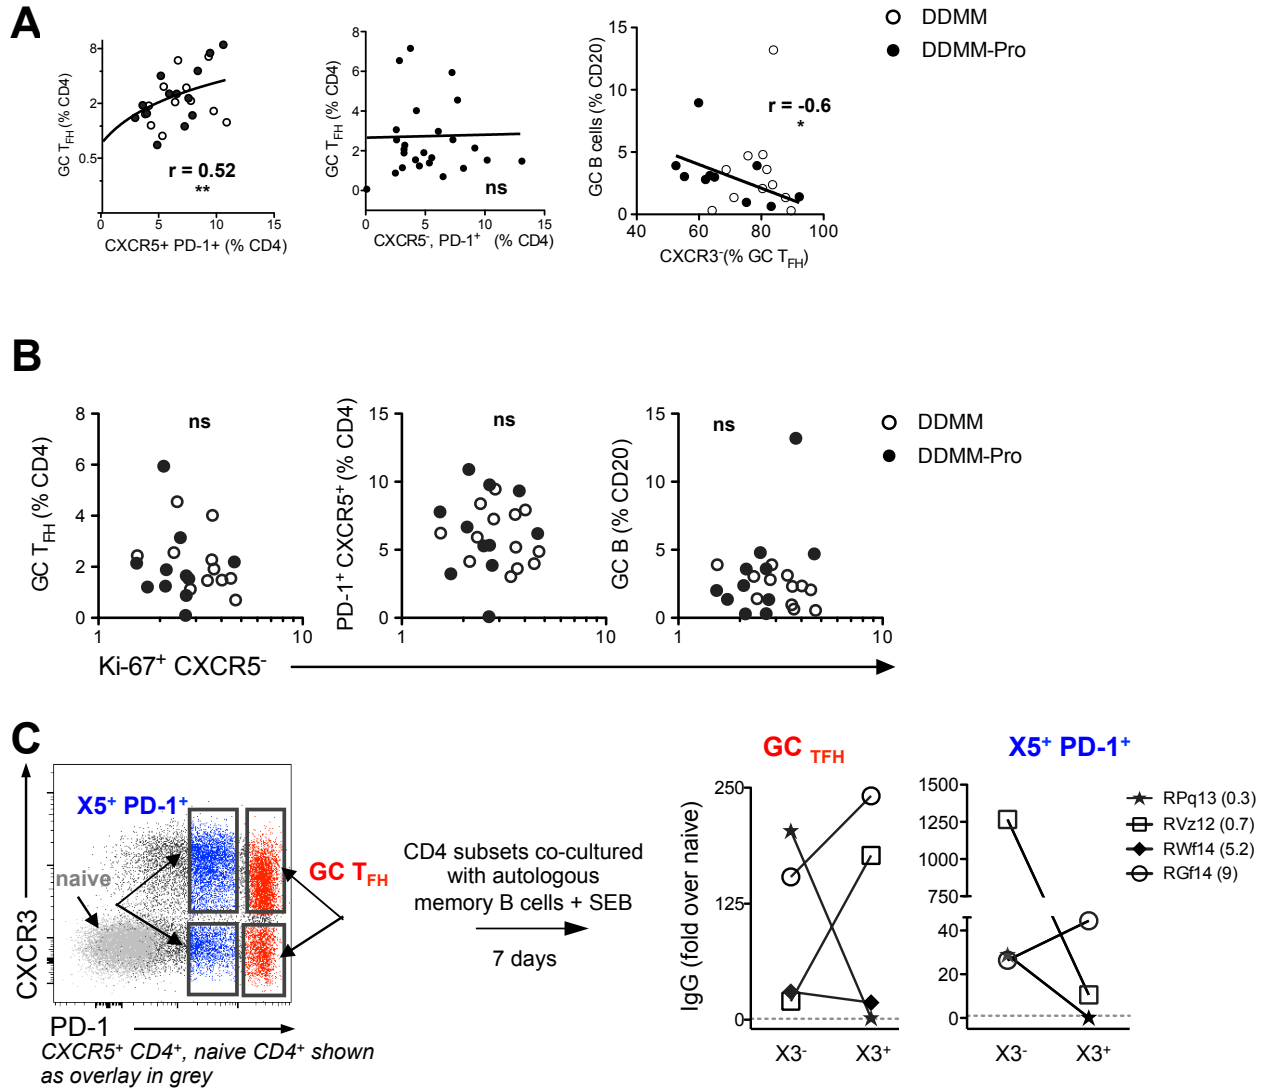

**Supplemental Figure 2: Association between lymph node CXCR5<sup>+</sup> and CXCR5<sup>-</sup> subsets.** GC T<sub>FH</sub> cells positively correlate with (A) CXCR5<sup>+</sup> PD1<sup>+</sup> cells but do not associate with CXCR5<sup>-</sup>, PD-1<sup>+</sup> CD4<sup>+</sup> T cells. Right panel in A shows inverse association between CXCR3<sup>-</sup> GC T<sub>FH</sub> cells and GC B cell frequencies. (B) Ki-67<sup>+</sup> CXCR5<sup>-</sup> CD4 T cells at peak post 2<sup>nd</sup> MVA do not correlate with GC T<sub>FH</sub> cells, CXCR5<sup>+</sup> PD-1<sup>+</sup> cells, and with GC B cells. (C) Indicated CD4 subsets from lymph node at 2 weeks post 2<sup>nd</sup> MVA were FACS sorted and co-cultured with autologous memory B cells in the presence of SEB. IgG in supernatant is expressed in X3<sup>-</sup> and X3<sup>+</sup> GC T<sub>FH</sub> and CXCR5<sup>+</sup> PD1<sup>+</sup> subsets as fold increase over IgG in naive-B cell co-cultures. Data are shown for 4 animals assayed independently and values in parenthesis indicate IgG in supernatant (pg/mL) in naive-B cell co-cultures.

### Supplemental Figure 3

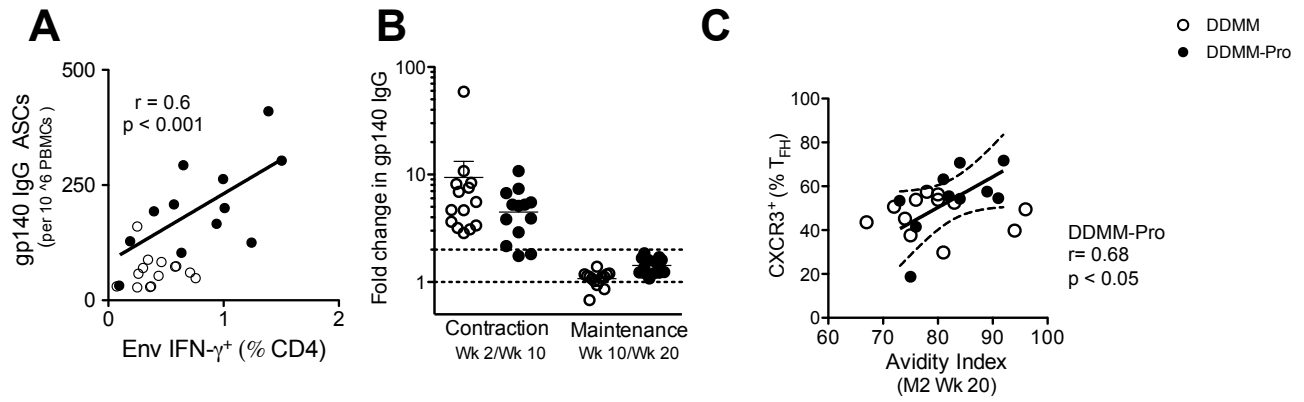

**Supplemental Figure 3: Determinants of vaccine-induced B cell responses.** (A) Gp140 ASC response correlate with Env IFN $\gamma^+$  CD4 responses (B) Antibody titers undergo contraction between week 2 to week 10 after 2<sup>nd</sup> MVA boost and are largely maintained from week 10 to week 20 (C) CXCR3 expression on T<sub>FH</sub> cells directly correlates with antibody avidity.

## Supplemental Figure 4

Week 3 post-infection

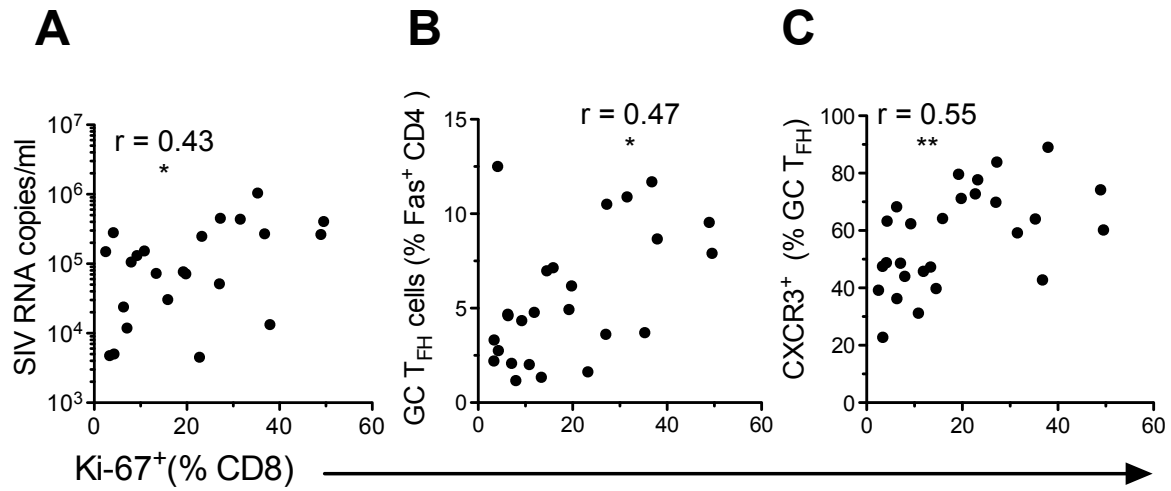

**Supplemental Figure 4: Association between Ki-67<sup>+</sup> CD8 T cell responses and GC T<sub>FH</sub> cell responses at 3 weeks post-infection.** Frequency of Ki-67<sup>+</sup> CD8 T cells in blood correlate with concurrent measurements of (A) peak plasma viral load (B) GC T<sub>FH</sub> cells (C) CXCR3<sup>+</sup> GC T<sub>FH</sub> cells.
